# Supplementary material for: Selective enhancement of attentional networks in college table tennis athletes: a preliminary investigation
Source: PeerJ. 2016 Dec 6;4:e2762. doi: 10.7717/peerj.2762 (PMC5144722; doi:10.7717/peerj.2762)
Supplement: Data S1 [file peerj-04-2762-s001.xlsx]

## Sheet: ANT data
	reaction time (s)														accutacy													attentional network
	no cue congruent	no cue uncongruent	no cue no flanker	center cue congruent	center cue uncongruent	center cue no flanker	double cue congruent	double cue uncongruent	double cue no flanker	spatial cue congruent	spatial cue uncongruent	spatial cue no flanker	group		no cue congruent	no cue uncongruent	no cue no flanker	center cue congruent	center cue uncongruent	center cue no flanker	double cue congruent	double cue uncongruent	double cue no flanker	spatial cue congruent	spatial cue uncongruent	spatial cue no flanker		alerting	orienting	executive control		meam rt	mean acc
1	0.494623	0.617018	0.492566	0.487416	0.565332	0.469921	0.490996	0.566634	0.513444	0.481966	0.564039	0.461198	1		1	0.8125	1	1	0.9375	1	1	0.9375	0.9375	1	1	1		11.0443	5.15551	89.5051		517.096	0.96875
2	0.454555	0.486817	0.425078	0.388342	0.491639	0.400994	0.402949	0.486023	0.380114	0.399554	0.491925	0.408297	1		1	1	1	1	0.875	1	1	0.875	1	0.9375	0.75	1		32.4549	-6.26642	77.7511		434.691	0.953125
3	0.470436	0.5467	0.43373	0.42082	0.513865	0.445685	0.431218	0.534379	0.426791	0.419174	0.458118	0.392196	1		1	1	1	0.9375	1	0.9375	1	1	0.9375	1	1	1		19.4925	36.9606	77.8535		457.759	0.984375
4	0.526764	0.615746	0.525511	0.534806	0.588949	0.537273	0.513613	0.600112	0.517897	0.516465	0.56882	0.502139	1		1	0.9375	1	1	1	1	1	1	1	1	1	1		12.1332	24.5349	70.4947		545.675	0.994792
5	0.488534	0.577428	0.48721	0.458488	0.581904	0.469704	0.446206	0.563064	0.488153	0.464764	0.524927	0.445979	1		1	0.9375	1	1	0.9375	1	0.9375	1	1	1	1	1		18.5832	24.8085	97.3326		499.697	0.984375
6	0.580284	0.54798	0.554106	0.509907	0.558993	0.496015	0.514875	0.563104	0.510934	0.47982	0.549574	0.479163	1		0.9375	0.9375	0.9375	0.9375	0.9375	1	0.9375	1	1	1	1	1		31.1528	18.7861	33.6911		528.729	0.96875
7	0.410886	0.473007	0.404854	0.409855	0.445129	0.38031	0.4038	0.473094	0.387762	0.383042	0.426959	0.369918	1		1	1	1	1	0.875	1	1	0.9375	0.9375	1	1	1		8.03038	18.4584	52.6513		414.051	0.979167
8	0.485611	0.617395	0.465682	0.424928	0.579689	0.436125	0.456499	0.587135	0.43316	0.439373	0.577223	0.434357	1		1	0.75	1	1	1	1	1	0.875	1	1	1	1		30.6309	-3.40402	138.758		494.765	0.96875
9	0.525229	0.526776	0.509784	0.465382	0.495252	0.450259	0.472537	0.511149	0.464946	0.44328	0.462094	0.439775	1		1	0.875	0.9375	1	0.875	1	0.9375	0.875	0.9375	0.9375	0.9375	1		37.7187	21.9147	22.2106		480.539	0.942708
10	0.464584	0.541218	0.494404	0.461196	0.496157	0.457818	0.463061	0.530921	0.496692	0.465838	0.529758	0.474176	1		0.875	0.9375	1	1	0.9375	1	1	0.875	1	1	1	0.9375		3.17723	-18.2	60.8441		489.652	0.963542
11	0.501919	0.557389	0.530129	0.478391	0.5488	0.533682	0.4742	0.538148	0.514221	0.480175	0.547851	0.468228	1		0.9375	1	1	1	1	0.9375	1	0.9375	1	1	1	1		20.9561	21.5397	64.3757		514.428	0.984375
12	0.440117	0.475545	0.43428	0.401773	0.475393	0.399718	0.40767	0.425604	0.394462	0.430326	0.461196	0.387972	1		1	0.875	0.9375	1	1	0.9375	0.9375	0.9375	1	1	0.9375	1		40.7354	-0.869557	39.4629		427.838	0.963542
13	0.508608	0.55828	0.460772	0.438438	0.566403	0.460911	0.456961	0.565073	0.446345	0.448775	0.506659	0.424962	1		1	0.875	1	1	0.8125	0.9375	1	0.9375	1	1	0.9375	0.9375		19.7599	28.4519	85.9086		486.849	0.953125
14	0.510947	0.583308	0.562478	0.541288	0.586434	0.530214	0.506274	0.601835	0.491858	0.46411	0.491686	0.487721	1		1	0.9375	0.9375	1	1	1	1	0.9375	1	1	1	1		18.9219	71.4727	60.1611		529.846	0.984375
15	0.489037	0.521732	0.474758	0.436249	0.51464	0.452055	0.475437	0.544637	0.469396	0.439505	0.509216	0.444285	1		1	0.875	1	0.9375	0.9375	1	1	1	0.9375	1	1	1		-1.31447	3.31246	62.4994		480.912	0.973958
16	0.483316	0.586333	0.514967	0.494156	0.556476	0.492442	0.531501	0.569811	0.497376	0.462597	0.508004	0.461801	1		1	1	1	1	1	1	1	0.9375	0.9375	1	1	1		-4.69078	36.8905	62.2636		513.232	0.989583
17	0.534828	0.568278	0.512944	0.463029	0.507146	0.470978	0.426147	0.548386	0.448811	0.42924	0.488559	0.41152	1		1	0.875	0.9375	1	0.8125	1	1	0.9375	0.9375	0.9375	0.875	1		64.2349	37.278	64.781		484.156	0.942708
18	0.532677	0.597839	0.582734	0.503749	0.567912	0.500978	0.51592	0.558291	0.512215	0.487956	0.520711	0.489879	1		1	0.9375	1	1	1	1	1	1	0.875	1	0.9375	1		42.2747	24.6974	51.1125		530.905	0.979167
19	0.527574	0.560557	0.507127	0.475157	0.516647	0.471606	0.489083	0.505646	0.456042	0.436643	0.471078	0.442652	1		1	1	1	1	0.875	1	1	1	0.9375	0.9375	1	0.9375		48.1622	37.6791	31.3676		488.318	0.973958
20	0.507508	0.561799	0.492584	0.465392	0.543633	0.481421	0.453993	0.554507	0.425683	0.477637	0.543964	0.438007	1		1	0.9375	1	1	1	1	1	0.9375	1	1	1	1		42.5695	10.2792	74.843		495.511	0.989583
21	0.452298	0.517354	0.442045	0.433146	0.487767	0.441299	0.444537	0.487989	0.43038	0.393229	0.431428	0.401341	1		0.9375	0.9375	1	1	0.9375	1	1	0.9375	1	1	1	1		16.2637	45.405	50.3319		446.901	0.979167
22	0.47874	0.552442	0.488546	0.484532	0.548837	0.479641	0.46459	0.547763	0.496806	0.444034	0.497123	0.453016	1		0.9375	0.9375	1	1	1	1	0.9375	1	1	1	1	1		3.52328	39.6124	68.5671		494.672	0.984375
23	0.459947	0.530596	0.500195	0.461989	0.473806	0.476793	0.469312	0.536486	0.464519	0.47771	0.487608	0.443058	1		1	0.875	0.9375	0.9375	1	1	1	1	1	1	1	1		6.80683	1.40387	39.8844		481.835	0.979167
24	0.496056	0.553722	0.498291	0.453719	0.567821	0.485792	0.469838	0.533816	0.496746	0.433241	0.462537	0.43531	1		1	1	1	1	1	0.9375	0.9375	0.9375	1	1	1	1		15.8899	58.7484	66.2604		490.574	0.984375
25	0.532602	0.610439	0.528458	0.518365	0.591989	0.518691	0.533229	0.601236	0.514497	0.489147	0.541686	0.511401	1		1	0.8125	1	1	1	1	1	0.9375	1	0.9375	1	1		7.51225	28.9367	68.0018		540.978	0.973958
26	0.447829	0.484364	0.458344	0.424293	0.465183	0.382287	0.397849	0.435477	0.399306	0.409679	0.408799	0.416573	1		0.875	0.875	0.9375	1	0.875	1	0.9375	1	0.9375	1	1	1		52.6352	12.2377	28.5434		427.498	0.953125
27	0.469721	0.534892	0.461884	0.445534	0.465643	0.447207	0.50168	0.531674	0.451782	0.398583	0.508194	0.441351	1		1	1	1	1	0.875	1	0.8125	0.9375	1	0.875	0.9375	1		-6.21265	3.41873	56.2209		471.512	0.953125
28	0.441191	0.522188	0.443004	0.473867	0.548278	0.426173	0.467843	0.556477	0.461738	0.429737	0.463925	0.383075	1		0.75	0.9375	0.9375	0.875	1	1	0.8125	1	1	0.8125	1	0.9375		-26.5587	57.1938	69.5578		468.125	0.921875
29	0.41797	0.505474	0.440134	0.454938	0.51331	0.458015	0.409281	0.500065	0.441152	0.410862	0.472427	0.416647	1		1	1	1	1	0.8125	1	0.9375	0.9375	1	1	1	1		4.36047	42.1091	74.5564		453.356	0.973958
30	0.471226	0.53203	0.463082	0.420145	0.531753	0.414778	0.419244	0.513976	0.418072	0.410508	0.469095	0.388706	1		1	0.8125	0.9375	1	0.8125	1	1	1	1	0.9375	0.875	0.9375		38.3487	32.789	81.4327		454.385	0.942708
31	0.517003	0.57707	0.515446	0.477531	0.552161	0.457914	0.450414	0.572725	0.478504	0.410302	0.49488	0.444748	1		1	0.875	1	0.9375	0.75	0.9375	1	0.8125	0.9375	1	0.9375	1		35.9587	45.8919	85.3968		495.725	0.932292
32	0.523552	0.6375	0.528824	0.492563	0.627004	0.506182	0.518359	0.57517	0.531615	0.536729	0.5854	0.503037	1		1	0.875	1	1	1	1	1	1	1	1	1	1		21.5773	0.194244	88.4677		547.161	0.989583
33	0.455552	0.515741	0.483215	0.429485	0.530718	0.461929	0.421574	0.534982	0.44015	0.412945	0.485739	0.482611	1		1	0.9375	1	1	0.9375	1	0.9375	0.8125	0.875	1	1	1		19.2673	13.6123	86.906		471.22	0.958333
34	0.492027	0.54386	0.518889	0.482735	0.567448	0.514589	0.489604	0.590238	0.470201	0.438972	0.515932	0.46917	1		1	1	1	1	0.875	1	1	0.9375	1	1	1	1		1.57767	46.8998	78.5348		507.805	0.984375
35	0.408447	0.469094	0.417799	0.405978	0.454372	0.414364	0.406442	0.47491	0.418277	0.380555	0.432739	0.39704	2		1	0.8125	0.9375	1	0.8125	1	1	0.875	1	0.9375	0.875	1		-1.43011	21.4599	57.4235		423.335	0.9375
36	0.441802	0.4771	0.461773	0.40551	0.479443	0.410425	0.431647	0.46015	0.432322	0.367246	0.406574	0.376598	2		1	1	0.875	1	0.9375	0.9375	1	0.875	0.9375	1	0.9375	1		18.8522	48.3199	44.2653		429.216	0.958333
37	0.439564	0.454502	0.427633	0.431919	0.465524	0.421939	0.41313	0.440617	0.408758	0.397506	0.438203	0.385056	2		0.9375	0.9375	0.9375	1	1	1	1	1	1	1	1	1		19.7316	32.8724	29.1818		427.029	0.984375
38	0.581339	0.626852	0.606671	0.547455	0.641215	0.57847	0.509959	0.570747	0.542365	0.513924	0.526832	0.509238	2		1	1	1	1	0.9375	1	0.9375	1	1	1	1	1		63.9302	72.3814	53.2422		562.922	0.989583
39	0.599035	0.630966	0.591012	0.58109	0.613011	0.534908	0.5359	0.591624	0.577548	0.60072	0.565101	0.529544	2		0.9375	0.9375	1	1	0.9375	1	1	1	1	1	1	1		38.6474	11.2146	20.9893		579.205	0.984375
40	0.503144	0.550965	0.51158	0.473231	0.564749	0.451193	0.459707	0.567507	0.467483	0.449283	0.507999	0.426825	2		1	0.9375	1	1	0.9375	0.9375	1	1	1	1	0.875	1		23.6638	35.0223	76.4635		494.472	0.973958
41	0.528803	0.569568	0.529766	0.474038	0.58695	0.469679	0.495888	0.553251	0.495727	0.476455	0.52957	0.485244	2		0.9375	1	0.9375	0.9375	0.9375	1	1	1	1	1	0.9375	1		27.7569	13.1326	66.0387		516.245	0.973958
42	0.48515	0.532088	0.473213	0.490556	0.540531	0.507803	0.473942	0.545901	0.483017	0.451398	0.479724	0.457541	2		1	0.9375	1	1	0.9375	0.9375	1	1	1	1	1	1		-4.13656	50.076	49.2995		493.405	0.984375
43	0.435089	0.495082	0.453566	0.431475	0.493979	0.421882	0.448756	0.478208	0.445683	0.4161	0.463634	0.415447	2		1	1	0.9375	1	1	1	1	0.9375	1	1	1	1		3.69698	17.3851	49.8705		449.908	0.989583
44	0.429906	0.456222	0.435365	0.397049	0.461938	0.414454	0.402789	0.476238	0.402654	0.367793	0.421096	0.38143	2		1	0.8125	1	1	0.9375	0.9375	1	0.625	0.9375	1	1	1		13.2705	34.3741	54.4894		420.578	0.9375
45	0.540352	0.596195	0.540851	0.50156	0.595966	0.531834	0.545528	0.585664	0.514693	0.481681	0.512977	0.477707	2		0.8125	0.9375	1	1	1	1	1	0.9375	1	1	1	1		10.5041	52.332	55.4199		535.417	0.973958
46	0.488214	0.570602	0.472322	0.450988	0.518665	0.466788	0.494329	0.549501	0.454768	0.470614	0.529557	0.444535	2		0.9375	1	1	1	0.9375	1	1	0.875	1	1	0.9375	1		10.8468	-2.75488	66.0451		492.574	0.973958
47	0.558699	0.648104	0.601219	0.538296	0.650989	0.550759	0.600988	0.659595	0.575618	0.485216	0.591377	0.538518	2		1	0.9375	1	1	0.875	1	1	1	1	1	1	1		-9.39297	41.644	91.7162		583.282	0.984375
48	0.468138	0.513095	0.432086	0.422939	0.438741	0.427023	0.410116	0.498595	0.41352	0.392512	0.444311	0.388747	2		1	0.875	0.875	0.9375	0.6875	0.9375	1	0.875	0.9375	1	0.9375	0.875		30.3627	21.0439	50.2591		437.485	0.911458
49	0.528275	0.62065	0.498781	0.482932	0.585633	0.475593	0.483712	0.551175	0.454112	0.467544	0.520565	0.450167	2		1	0.875	1	1	0.9375	0.9375	1	0.9375	1	1	1	1		52.9024	35.2937	78.8899		509.928	0.973958
50	0.449392	0.489274	0.428294	0.4546	0.461779	0.419891	0.434718	0.491447	0.413485	0.403036	0.439301	0.427626	2		1	0.875	1	1	0.875	1	1	0.875	0.9375	1	1	1		9.1035	22.1021	35.0137		442.737	0.963542
51	0.51933	0.553443	0.478405	0.468644	0.567806	0.492722	0.510931	0.603863	0.482646	0.479921	0.516118	0.462883	2		1	0.875	1	1	0.8125	1	1	0.8125	0.9375	1	0.9375	1		-15.4206	23.4167	65.6007		511.393	0.947917
52	0.467639	0.516215	0.469997	0.40921	0.533746	0.432449	0.433285	0.481283	0.428736	0.442187	0.473684	0.419171	2		0.9375	0.9375	0.875	1	0.875	0.9375	1	0.9375	1	1	1	0.9375		36.8491	13.4541	63.1516		458.967	0.953125
53	0.388237	0.484036	0.414283	0.385369	0.448517	0.401113	0.405635	0.465746	0.404167	0.3894	0.436865	0.375419	2		1	0.9375	1	1	0.8125	1	1	0.875	1	1	0.9375	1		3.66965	11.1051	66.6307		416.566	0.963542
54	0.457179	0.473876	0.445129	0.439001	0.487177	0.428926	0.43768	0.451074	0.434748	0.411002	0.402366	0.403212	2		0.9375	0.9375	1	1	0.9375	1	0.9375	0.8125	1	1	1	1		17.5604	46.1747	17.4078		439.281	0.963542
55	0.498011	0.565534	0.525654	0.528406	0.540627	0.498228	0.49981	0.573429	0.502029	0.488359	0.498439	0.477004	2		1	1	0.9375	1	0.9375	1	1	1	1	1	1	1		4.64405	34.4864	40.8608		516.294	0.989583
56	0.449165	0.517891	0.455508	0.429128	0.49763	0.418251	0.447788	0.477873	0.416059	0.421948	0.437735	0.415811	2		1	0.875	1	1	0.9375	0.9375	1	0.875	1	1	1	1		26.948	23.1713	45.7752		448.732	0.96875
57	0.427482	0.449193	0.430043	0.390535	0.395462	0.385832	0.372091	0.43106	0.369192	0.358102	0.362208	0.348032	2		0.9375	1	0.9375	1	0.625	1	0.9375	0.9375	0.9375	1	0.875	1		44.7918	34.496	22.4285		393.269	0.932292
58	0.435414	0.443257	0.456605	0.449646	0.451823	0.443033	0.445763	0.439995	0.420211	0.429675	0.422357	0.41091	2		0.9375	0.9375	1	0.9375	0.9375	1	1	1	0.9375	1	1	0.9375		9.7694	27.1867	-0.766437		437.391	0.96875
59	0.529883	0.548051	0.535354	0.48154	0.493906	0.478202	0.509876	0.534546	0.484167	0.451525	0.487028	0.510495	2		1	1	0.9375	1	1	0.9375	1	0.9375	1	1	1	0.9375		28.2329	1.53304	22.6765		503.714	0.979167
60	0.489557	0.522765	0.469972	0.483466	0.547773	0.460182	0.479078	0.539553	0.465889	0.43237	0.458014	0.443238	2		1	0.9375	1	1	1	1	1	1	1	1	1	1		-0.741926	52.5998	45.9083		482.655	0.994792
61	0.447485	0.520349	0.459435	0.419344	0.537618	0.405178	0.46685	0.467419	0.429451	0.405604	0.48848	0.421629	2		0.9375	0.9375	1	1	1	1	1	0.875	1	1	0.875	0.9375		21.1833	15.4757	68.6457		455.737	0.963542
62	0.434039	0.550652	0.472784	0.435524	0.521587	0.447888	0.429283	0.50628	0.431387	0.40435	0.480157	0.424375	2		1	1	1	1	0.875	1	1	1	1	0.9375	0.9375	1		30.1747	32.039	88.8701		461.526	0.979167
63	0.499617	0.54012	0.508698	0.505236	0.509997	0.466692	0.466111	0.50886	0.47857	0.48012	0.495522	0.478265	2		0.875	0.9375	1	0.9375	1	1	1	0.9375	0.9375	1	0.875	1		31.6316	9.33938	25.8536		494.817	0.958333
64	0.441462	0.510505	0.416641	0.420139	0.502389	0.437969	0.420347	0.488222	0.430375	0.391956	0.470623	0.395293	2		1	0.8125	1	0.9375	0.8125	0.9375	1	1	0.9375	1	1	1		9.88806	34.2082	74.4589		443.827	0.953125
65	0.464557	0.513959	0.459524	0.430136	0.457431	0.430664	0.412391	0.515208	0.458436	0.365721	0.407433	0.394009	2		0.9375	0.875	1	0.9375	0.9375	1	1	0.875	1	1	1	1		17.3349	50.3558	55.3062		442.456	0.963542

## Sheet: participants
No.	male 1，female 2	Vigorous days	lasting time (min)		moderate days	lasting time		walking days	lasting days		overall PA	age	weight	height	BMI	group
1	1	1	30	240	2	30	240	7	60	1386	1866	23	70	1.83	20.9024	1
2	2	2	90	1440	1	360	1440	7	120	2772	5652	22	67	1.64	24.9108	1
3	1	2	15	240	1	10	40	5	30	495	775	20	50	1.67	17.9282	1
4	1	3	90	2160	4	45	720	7	120	2772	5652	22	68	1.7	23.5294	1
5	2	1	30	240	0	0	0	1	10	33	273	26	50	1.59	19.7777	1
6	1	7	30	1680	7	60	1680	7	30	693	4053	24	66	1.76	21.3068	1
7	1	4	90	2880	2	30	240	7	60	2508	5628	20	85	1.88	24.0493	1
8	1	3	90	2160	1	60	240	7	60	1386	3786	20	60	1.83	17.9163	1
9	2	4	60	1920	0	0	0	7	20	462	2382	25	55	1.6	21.4844	1
10	1	2	30	480	2	30	240	2	20	132	852	22	56	1.6	21.875	1
11	1	0	0	0	5	300	6000	7	150	3465	9465	20	50	1.69	17.5064	1
12	1	1	60	480	1	120	480	7	30	693	1653	22	58	1.78	18.3058	1
13	1	3	30	720	7	180	5040	6	20	396	6156	22	63	1.67	22.5896	1
14	1	5	30	1200	0	0	0	2	40	264	1464	22	63	1.69	22.0581	1
15	1	2	90	1440	0	0	0	7	60	1386	2826	20	66	1.72	22.3094	1
16	1	3	30	720	3	20	240	7	60	1386	2346	25	57	1.6	22.2656	1
17	2	2	30	480	3	30	360	7	30	693	1533	22	52	1.56	21.3675	1
18	2	0	0	0	2	40	320	7	180	4158	4478	21	62	1.72	20.9573	1
19	2	1	120	960	0	0	0	0	0	0	960	20	47.5	1.56	19.5184	1
20	2	5	30	1200	5	30	600	5	30	495	2295	22	60	1.6	23.4375	1
21	2	0	0	0	2	60	480	3	90	891	1371	25	50	1.63	18.8189	1
22	2	0	0	0	0	0	0	5	150	2475	2475	22	51	1.62	19.433	1
23	2	2	120	1920	5	60	1200	2	90	594	3714	23	58	1.64	21.5645	1
24	2	0	0	0	2	60	480	0	0	0	480	21	46	1.5	20.4444	1
25	2	2	30	480	1	30	120	1	20	66	666	20	48	1.58	19.2277	1
26	1	1	20	160	2	10	80	3	20	198	438	23	71	1.78	22.4088	1
27	1	2	150	2400	3	180	2160	5	30	495	5055	21	68	1.79	21.2228	1
28	1	3	60	1440	5	30	600	5	20	330	2370	21	66	1.76	21.3068	1
29	1	0	0	0	5	120	2400	7	180	4158	6558	19	61	1.73	20.3816	1
30	1	7	540	30240	0	0	0	0	0	0	30240	20	75	1.78	23.6713	1
31	2	4	60	1920	4	120	1920	7	80	1848	5688	25	58	1.63	21.83	1
32	2	5	90	3600	5	120	2400	7	120	2772	8772	21	66	1.65	24.2424	1
33	1	5	130	4800	5	80	1600	5	90	1485	7885	23	78	1.81	23.8088	1
34	1	3	70	1680	1	50	200	7	140	3234	5114	21	77	1.85	22.4982	1
35	2	4	120	3840	6	240	5760	7	120	2772	12372	22	45	1.58	18.026	2
36	2	1	40	320	2	60	480	7	60	1386	2186	20	51	1.64	18.9619	2
37	1	7	120	6720	7	120	3360	7	60	1386	11466	19	80	1.8	24.6914	2
38	2	3	90	2160	4	120	1920	1	30	99	4179	22	57	1.62	21.7193	2
39	1	4	30	960	5	60	1200	1	60	198	2358	20	63	1.71	21.5451	2
40	2	4	180	5760	3	120	1440	7	180	4158	11358	20	60	1.67	21.5139	2
41	2	3	90	2160	2	60	480	2	15	99	2739	20	61	1.66	22.1367	2
42	2	3	150	3600	1	150	600	7	190	4389	8589	23	50	1.6	19.5312	2
43	2	2	90	1440	4	180	2880	0	0	0	4320	20	60	1.66	21.7738	2
44	1	4	120	3840	3	60	720	6	30	594	5154	22	74	1.79	23.0954	2
45	1	7	150	8400	7	120	3360	7	120	2772	14532	26	63	1.73	21.0498	2
46	2	2	90	1440	2	210	1680	5	180	2970	6090	21	53	1.65	19.4674	2
47	1	5	180	7200	5	60	1200	6	60	1188	9588	24	80	1.8	24.6914	2
48	1	5	150	6000	6	330	7920	0	0	0	13920	21	77.6	1.8	23.9506	2
49	1	3	90	2160	2	30	920	6	30	594	3674	23	80	1.88	22.6347	2
50	1	3	75	1800	5	45	900	5	150	2475	5175	22	68	1.81	20.7564	2
51	2	0	0	0	0	0	0	7	60	1386	1386	20	60	1.68	21.2585	2
52	1	5	45	1800	5	75	1500	7	50	1155	4455	25	60	1.72	20.2812	2
53	1	7	90	5040	6	40	960	7	115	2656	8656	21	70	1.85	20.4529	2
54	1	4	90	2880	0	0	0	7	40	924	3804	21	60	1.7	20.7612	2
55	1	1	120	960	3	120	1440	7	360	8316	10716	22	70	1.71	23.939	2
56	1	4	270	8640	3	150	1800	7	60	1386	11826	22	64	1.71	21.8871	2
57	2	4	120	3840	3	90	1080	7	30	924	5844	23	57	1.7	19.7232	2
58	1	4	180	5760	7	60	1680	6	60	1188	8628	20	72	1.8	22.2222	2
59	1	4	120	3840	4	120	1920	0	0	0	5760	21	64	1.7	22.1453	2
60	1	5	60	2400	7	30	840	6	12	237.6	3477.6	23	69	1.83	20.6038	2
61	1	5	120	4800	6	60	1440	3	30	297	6537	23	80	1.79	24.968	2
62	2	4	90	2880	2	60	480	5	50	825	4185	22	65	1.68	23.03	2
63	1	6	130	6240	3	90	1080	2	40	264	7584	24	62	1.74	20.4783	2
64	1	4	120	3840	2	30	240	4	20	264	4344	25	70	1.76	22.5981	2
65	1	2	30	480	2	30	240	0	0	0	720	22	75	1.83	22.3954	2
